# Supplementary material
Source: publisher figshare collection journal article supplement (https://tandf.figshare.com/ndownloader/files/15577256)
Supplement: Supplementary file 1 [file 15577256]

## Sheet: Sample analyzed
Supplementary Table 4
Major and trace elements data for the Shouwangfen complex.
Lithology	QM	QM	QM	QM	QM	QM	QM	QM	QM	QM	QM	QM	QM	QM	QM	QMD	QMD	QMD	QMD	QMD	QMD	QMD	QMD	MME	MME	MME	MME	MME	MME	MME	MME	MME	MME
Sample no.	16WF51	16SW121	16SW123	16XB82	16XB83	16WF52	16WF54	16WF69	16WF57*	16BZ72*	16BZ74*	16BZ76*	16XB84*	16SW102*	16BJ146*	16WF65*	16WF89*	18FJ10	18FJ11	18NG14	18NG15	18NG18	18PJ25	16WF67	16SW125	16BZ73	18XB05	18XB07	18XB09	18NG16	18BZ22	18CL27	18CL29
Major elements (wt. %)
SiO2	61.685	61.697	60.841	60.282	61.805	61.965	63.577	62.595	64.946	63.34	66.762	67.063	61.888	59.929	65.654	56.633	57.153	58.224	56.7955	58.5837	58.6808	55.8865	56.7955	54.432	54.99	52.663	56.5358	55.4969	54.0684	53.1594	53.549	54.8487	56.8657
TiO2	0.959	1.053	1.163	0.986	0.844	0.898	0.789	0.841	0.692	0.875	0.607	0.563	0.852	1.093	0.706	1.294	1.025	1.09682	1.18496	1.40016	1.24808	2.05449	1.06211	1.432	1.262	2.134	1.45721	1.4762	1.4181	2.27175	1.72321	1.87769	1.93751
Al2O3	14.731	14.816	15.241	15.554	15.327	15.134	14.938	15.165	15.067	14.282	14.796	14.511	15.257	15.308	14.958	15.984	15.014	16.4051	16.9788	15.3311	16.4169	15.8398	16.2719	17	13.566	15.564	16.3329	15.6968	16.7617	16.2657	16.4828	15.5208	15.1568
TFe2O3	6.462	6.231	6.672	6.251	5.825	6.012	5.425	5.954	4.676	5.891	4.588	4.232	5.637	6.796	4.539	7.35	7.262	5.92037	6.60536	6.97318	5.56992	8.2433	6.26809	8.289	8.295	10.175	6.72096	7.23133	7.49768	8.71014	7.52336	9.02073	7.16047
MgO	2.713	2.57	2.495	3.102	2.874	2.663	2.318	2.347	2.082	2.376	1.363	1.274	2.971	3.204	1.81	3.838	3.958	5.01816	4.7995	3.39126	3.29146	4.19875	4.7811	3.812	6.692	4.365	5.59184	5.54314	4.6891	4.95213	5.39376	4.00048	3.61208
MnO	0.078	0.08	0.084	0.08	0.081	0.072	0.069	0.071	0.062	0.079	0.053	0.048	0.084	0.084	0.068	0.088	0.137	0.0863912	0.0923236	0.0782124	0.0730422	0.10302	0.0900217	0.073	0.107	0.159	0.1031	0.112182	0.124981	0.110341	0.101165	0.16069	0.117889
CaO	3.82	3.44	3.572	3.859	3.842	3.807	3.41	3.441	2.976	3.608	2.521	2.291	3.801	4.131	2.885	5.04	5.239	5.05322	5.68906	4.40909	4.0167	3.6868	5.06926	5.503	6.1	6.385	5.75214	5.54626	6.55642	6.076	5.4846	4.64246	4.75246
Na2O	4.273	4.262	4.283	4.513	4.251	4.372	4.328	4.512	4.508	4.378	4.459	4.411	4.33	4.461	4.935	4.638	4.1	4.15443	4.4255	4.45562	4.63798	5.02176	4.39631	5.105	3.798	5.434	4.33813	4.22819	4.53328	4.26772	4.19675	5.48223	4.66179
K2O	4.142	4.649	4.492	4.091	4.289	4.342	4.353	4.523	4.415	4.099	4.334	4.596	4.178	4.056	3.868	3.915	4.959	3.61832	3.01318	3.64169	4.32137	3.26262	3.44627	2.716	3.567	1.802	2.93744	3.23372	3.05374	3.24361	3.56181	2.15868	3.88909
P2O5	0.423	0.48	0.539	0.478	0.389	0.399	0.352	0.363	0.328	0.509	0.307	0.28	0.404	0.523	0.377	0.617	0.432	0.510649	0.620501	0.620533	0.510376	0.964752	0.588451	0.748	0.577	1.057	0.674047	0.70851	0.511783	1.29175	0.783042	0.861922	0.587507
LOI	0.824661	0.824261	0.71858	0.900735	0.573466	0.42861	0.540944	0.28924	0.347162	0.660122	0.306686	0.29361	0.698287	0.510856	0.298275	0.699043	0.823124	0.58264	0.49055	0.459482	0.555645	0.325521	0.82533	0.988412	1.1549	0.363055	0.489923	0.701307	0.624067	0.518427	1.14173	0.537392	0.396629
Total	100.111	100.102	100.101	100.097	100.1	100.093	100.1	100.101	100.099	100.097	100.097	99.5626	100.1	100.096	100.098	100.096	100.102	100.67	100.695	99.344	99.3223	99.5873	99.5943	100.098	100.109	100.101	100.933	99.9746	99.8393	100.867	99.9412	99.1117	99.1378
Na2O+K2O	8.415	8.911	8.775	8.604	8.54	8.714	8.681	9.035	8.923	8.477	8.793	9.007	8.508	8.517	8.803	8.553	9.059	7.77275	7.43868	8.09731	8.95935	8.28439	7.84258	7.821	7.365	7.236	7.27557	7.46191	7.58702	7.51134	7.75856	7.64091	8.55088
K2O/Na2O	0.969342	1.0908	1.0488	0.906492	1.00894	0.993138	1.00578	1.00244	0.97937	0.936272	0.971967	1.04194	0.964896	0.909213	0.783789	0.844114	1.20951	0.870955	0.680868	0.817326	0.931736	0.649697	0.783902	0.532027	0.939179	0.331616	0.677121	0.764799	0.673627	0.760034	0.848708	0.393759	0.834249
AR	2.66	2.91	2.75	2.59	2.61	2.7	2.8	2.89	2.96	2.8	3.06	3.31	2.61	2.56	2.95	2.37	2.62	2.14	1.98	2.39	2.56	2.47	2.16	2.07	2.2	1.98	1.98	2.08	1.96	2.01	2.09	2.22	2.51
A/NK	1.27932	1.22999	1.27966	1.31209	1.31701	1.27239	1.26233	1.23088	1.23531	1.22688	1.23006	1.18618	1.3099	1.30493	1.21539	1.34665	1.23931	1.52569	1.61038	1.35993	1.33369	1.34299	1.48408	1.49919	1.34175	1.42907	1.58301	1.50101	1.55712	1.54422	1.5317	1.36668	1.27577
A/CNK	0.797451	0.809116	0.827581	0.823693	0.822456	0.803788	0.82783	0.815848	0.855228	0.784181	0.890228	0.884479	0.821561	0.795005	0.851727	0.759355	0.693255	0.822036	0.812165	0.79418	0.836509	0.85576	0.805636	0.795777	0.639261	0.691093	0.785435	0.763478	0.738186	0.753034	0.794316	0.783382	0.738031
Mg#	45.405	44.9654	42.5541	49.5717	49.4278	46.7361	45.8409	43.8473	46.8654	44.4123	37.0472	37.3566	51.0776	48.2914	44.1318	50.8453	51.9152	62.6733	59.0056	49.0675	53.9297	50.2238	60.175	47.6714	61.5105	45.9402	62.2375	60.2933	55.3349	52.9688	58.681	46.7658	49.9818
Trace elements (ppm)
Li	19.09	27.57	17.99	20.07	17.76	24.7	21.02	22.85	19.01	18.7	22.69	12.97	19.61	23.05	29.03	36.71	22.2	26.12	29.8	28.01	18.86	19.34	16.81	27.9	30.27	26.76	38.17	27.86	65.14	25.39	55.21	52.06	25.77
Be	2.5	5.269	4.223	3.202	3.395	2.839	3.146	3.615	2.795	2.324	2.855	3.126	3.81	2.909	6.374	2.8	3.903	3.315	2.743	3.111	3.712	2.76	2.888	2.608	3.103	3.624	2.623	2.975	5.011	2.782	11.51	4.879	2.844
V	83.72	88.4	92.7	91.47	80.74	82.9	71.59	78.77	63.47	80.31	53.42	47.39	82.28	93.6	57.85	115.8	123	108.522	124.321	106.722	92.4913	120.424	114.608	134.9	141.4	170.1	126.965	129.394	151.005	156.998	138.548	134.176	130.453
Cr	96.74	81.4	58.75	84.71	77.02	87.52	74.37	73.68	61.72	64.58	55.66	41.31	72.9	95.08	36.75	103.5	100.8	158.5	114.2	62.14	59.21	141	128.6	91.9	314	63.36	190.3	166.7	76.84	69.57	71.88	22.84	41.42
Co	14.56	14	14.74	19.04	13.89	14.07	11.95	14.03	10.32	12.73	7.787	5.934	14.56	16.65	9.045	18.74	18.69	22.31	22.97	16.88	14.21	24.03	20.69	18.84	29.69	23.5	25.67	28.39	28.45	25.89	21.6	20.9	19.58
Ni	40.22	35.35	33.47	45.92	39.98	40.43	32.54	36.62	27	27.02	12.51	10.9	41.46	47.41	19.17	57.06	50.2	86.93	70.76	41.01	40.56	86.14	70.31	55.11	144.7	33.34	91.07	98.01	33.34	69.83	37.18	26.04	34.19
Cu	15.49	94.76	662.3	21.84	22.06	16.08	24.85	19.06	11.36	15.59	19.65	14.46	13.61	19.51	61.79	21.97	50.03	22.71	28.9	13.57	23.32	33.35	23.14	25.21	401.8	41.91	17.82	88.71	126.7	745.5	10.16	8.948	22.07
Zn	69.9	83.14	83.85	66.59	59.09	71.94	68.37	71.14	63.54	62.95	49.15	35.04	57.51	80.69	57.68	74.58	92.27	78.28	85.77	80.58	73.76	98.12	75.42	66.89	74.12	97.11	105.8	102	101.4	107.7	110.3	116.8	88.35
Ga	19.74	22.47	22.23	20.93	19.82	20.96	20.68	22.04	20.26	19.82	20.25	19.7	19.8	21	21.01	21.98	20.92	22.54	23.53	22.38	22.02	21.87	21.41	24.4	19.49	24.69	21.89	22.82	23.51	22.83	32.13	26	22.52
Rb	89.88	183	160.9	87.95	83.66	113.8	122.9	138.3	127.3	87.21	99.92	129.4	75.63	82.07	115.7	64.65	158.2	119.004	81.3695	113.922	150.954	110.461	103.526	57.59	124.4	60.21	77.9892	104.591	145.977	129.422	275.515	51.5027	64.5376
Sr	749.8	733.3	805.5	894	820.9	811.8	810.7	830.4	768.9	953.9	733.5	683.5	801.1	960.2	778.2	1018	705.5	1096.2	1494.15	1080.45	963.585	1194.9	1285.2	1380	808.8	941.4	1250.55	1156.05	903.84	986.265	595.455	864.36	1116.15
Y	11.8113	15.4335	15.1973	15.3547	13.9374	10.8664	11.2601	11.4176	9.1341	11.4176	7.18917	7.28366	13.3862	12.6775	9.02386	15.276	16.5516	16.2341	15.8848	13.0011	13.2164	20.3673	16.2193	16.2209	14.1185	18.3233	11.2504	16.9106	24.5706	20.2387	15.5866	12.6453	16.9193
Zr	303.917	392.444	345.891	253.131	243.239	293.605	252.889	292.679	209.981	205.101	183.581	188.305	242.144	252.951	163.969	428.5	282.286	290.614	183.077	314.066	276.842	267.161	276.246	348.646	269.706	260.717	187.557	186.191	308.709	188.208	311.577	233.341	256.41
Nb	36.02	55.24	49.01	46.46	39.37	37.86	37.51	42.55	31.69	29.63	20.92	21.33	40.65	35.46	32.63	50.57	42.98	48.58	37.3	42.25	43.42	54.48	51.73	34.41	40.4	42.64	45.42	50.11	57.84	53.91	57.19	29.34	38.81
Cs	2.073	6.976	6.129	2.542	2.264	3.674	3.48	3.948	4.376	1.853	2.802	1.991	1.947	3.345	2.878	3.266	5.382	3.957	2.684	3.394	5.287	4.169	3.9	2.596	3.614	2.551	2.366	2.389	5.991	4.109	24.05	3.736	2.352
Ba	1277	1285	1387	1292	1322	1801	1487	1435	1490	1444	1163	1329	1311	1471	1193	1506	1334	1314	1622	1632	1597	538.8	1490	1742	1334	610.9	1222	1089	919.4	1118	1537	561.8	1486
La	55.0825	41.4057	54.0678	52.0129	48.5169	44.7652	48.0053	50.7339	33.6805	41.8661	40.0755	42.8041	55.8499	37.0912	46.8883	60.5396	40.2375	62.7841	62.1173	49.2612	45.6386	73.5451	79.5205	55.6794	43.4606	86.8018	56.4445	61.8279	86.2345	82.711	126.152	65.775	65.929
Ce	121.298	97.6893	118.041	114.785	111.529	102.574	96.0612	101.76	80.5123	96.8753	86.2922	89.5486	107.458	94.433	99.0733	123.74	105.179	138.311	136.68	116.871	113.441	154.931	162.202	117.227	104.039	160.129	116.241	131.959	188.64	173.081	215.527	110.811	139.634
Pr	11.8359	11.8359	13.4085	13.3258	11.5049	10.5116	10.6772	11.1738	8.69072	12.0015	8.60795	8.85626	11.7532	11.0082	10.0564	14.319	12.2498	15.4003	15.4854	13.5563	12.7774	17.5055	17.3639	14.1535	11.1986	18.4823	12.2401	14.9931	19.6029	19.7714	21.1131	11.9084	15.5889
Nd	40.381	43.7247	48.1829	48.0971	39.8666	36.8659	36.7802	38.1519	31.0359	43.2103	29.3213	29.7499	40.2096	41.2384	34.0967	51.6123	45.5165	53.3069	54.7733	48.0837	44.7872	62.3923	58.0192	53.4984	41.4441	66.0243	40.2171	52.0776	66.3102	70.232	70.7129	42.2492	54.538
Sm	6.34692	7.55422	7.83017	7.9509	6.56251	5.88125	5.85538	6.0451	4.91542	6.68324	4.47562	4.53598	6.53664	6.97644	5.17326	8.39933	7.97505	9.21448	9.2649	8.24229	7.69224	10.8285	9.86663	8.96848	7.14719	10.4776	6.14734	8.95038	11.347	12.1674	11.0559	7.16058	9.31113
Eu	1.75313	2.02948	2.25402	2.35765	2.01221	1.82222	1.72722	1.81358	1.49404	1.91721	1.31269	1.30405	1.91721	2.1763	1.58645	2.7031	1.92585	2.66811	2.87309	2.58551	2.27767	3.22461	2.89953	3.11763	2.23675	2.64178	1.82062	2.60716	2.8972	2.87473	2.51044	1.427	2.7127
Gd	5.40506	5.92561	6.3247	6.48954	5.48314	4.91054	4.92789	5.032	3.98222	5.35301	3.63519	3.64386	5.48314	5.48314	4.22167	6.97539	6.40539	7.75094	7.73634	6.8756	6.37278	9.35165	8.19738	7.34846	5.83538	8.42947	5.45796	7.64957	10.1541	10.354	9.64215	6.13034	8.02575
Tb	0.569639	0.714174	0.714174	0.731178	0.620651	0.527129	0.535631	0.552635	0.433606	0.569639	0.374091	0.365589	0.612149	0.620651	0.45061	0.765187	0.757535	0.911316	0.842357	0.758798	0.742936	1.09944	0.914134	0.816199	0.666563	0.915673	0.575238	0.861603	1.20237	1.14804	0.954103	0.692766	0.922138
Dy	2.63137	3.36327	3.28485	3.40684	2.97118	2.36997	2.4571	2.44839	2.03887	2.57038	1.62936	1.63807	2.91019	2.89276	1.95784	3.48525	3.67172	3.90214	3.75392	3.19156	3.17659	4.74713	3.87388	3.67694	3.19685	4.15181	2.46107	3.82993	5.6483	4.9231	3.89281	3.00715	4.07544
Ho	0.453944	0.584889	0.576159	0.602348	0.541241	0.427755	0.427755	0.427755	0.349188	0.436484	0.27935	0.27062	0.515052	0.497592	0.330855	0.593619	0.647743	0.724612	0.693267	0.560693	0.585502	0.890734	0.718347	0.628538	0.556081	0.712343	0.454724	0.716122	1.08705	0.872793	0.6698	0.542865	0.726788
Er	1.20683	1.56538	1.50417	1.55664	1.42546	1.09315	1.13687	1.12813	0.926987	1.18934	0.708358	0.734594	1.39923	1.28554	0.896379	1.54789	1.73329	1.91264	1.87004	1.49695	1.56097	2.34596	1.94863	1.60036	1.45257	1.86359	1.31944	1.95999	3.07627	2.30481	1.76973	1.43214	1.86472
Tm	0.148853	0.201389	0.183877	0.192633	0.192633	0.131341	0.148853	0.140097	0.113829	0.140097	0.0788045	0.0875605	0.175121	0.157609	0.111202	0.183877	0.226782	0.274756	0.258661	0.204809	0.212256	0.327701	0.268625	0.192633	0.178623	0.225906	0.207011	0.269987	0.437982	0.299356	0.218636	0.17732	0.246617
Yb	0.837644	1.11947	1.04118	1.08815	1.08815	0.759359	0.782845	0.821987	0.65759	0.775016	0.469707	0.469707	0.970727	0.853301	0.63019	1.03336	1.28387	1.51917	1.4289	1.09316	1.16092	1.79609	1.53554	1.00204	1.013	1.18288	1.24502	1.57025	2.58394	1.67752	1.24789	0.954407	1.2456
Lu	0.131907	0.175875	0.167082	0.175875	0.175875	0.123113	0.131907	0.131907	0.105525	0.123113	0.0703502	0.0703502	0.158288	0.1407	0.0993696	0.167082	0.204015	0.243547	0.223325	0.168019	0.182955	0.280357	0.238203	0.158288	0.160926	0.184669	0.214645	0.266467	0.432119	0.252141	0.187625	0.146497	0.19632
Hf	9.096	10.68	10.548	9.075	8.457	7.843	7.803	8.93	7.088	7.804	6.235	6.125	7.332	7.902	7.452	11.437	7.234	9.215	7.561	10.494	8.703	8.472	9.256	9.422	9.215	8.87	6.179	6.481	9.364	7.936	8.792	6.346	7.848
Ta	1.799	3.866	2.975	2.76	2.288	2.236	2.343	2.456	2.005	1.874	1.316	1.335	2.521	1.826	2.06	2.477	2.272	2.615	1.906	2.213	2.417	2.752	2.537	1.71	2.328	2.119	2.395	2.547	3.342	2.696	2.716	0.86	2.213
Pb	21.64	27.67	25.29	20.59	19.76	22.09	24.03	27.26	28.28	19.23	19.23	16.47	18.44	22.22	20.77	22.5	23.27	16.92	15.22	23.66	21.41	18.07	16.7	20.17	13.58	10.96	24.24	19.46	17.09	19.15	10.79	13.01	17.87
Th	17.69	26.96	26.8	15.49	13.26	15.54	17.2	18.72	16.02	11.45	14.37	13.56	13.25	11.32	15.75	9.081	4.755	17.24	11.31	14.37	19.6	15.51	19	9.282	18.39	6.596	10.59	10.26	13.29	10.69	19.01	5.84	7.89
U	1.377	5.1264	5.9022	2.6676	2.0907	3.87	5.0922	3.9402	3.7719	2.6928	2.0682	1.7577	2.0466	3.0033	5.0148	2.3238	1.9485	2.924	2.247	2.895	4.798	3.392	3.689	2.8845	3.1608	2.1429	3.366	2.579	4.735	3.098	6.317	1.494	2.466
ΣREE	248.082	217.889	257.581	252.773	232.49	212.762	209.655	220.361	168.937	213.711	177.33	184.079	235.949	204.855	205.573	276.065	228.014	298.924	298.001	252.95	240.609	343.266	347.566	268.068	222.586	362.223	245.045	289.539	399.654	382.669	465.655	252.415	305.018
LREE/HREE	20.7898	14.9625	17.6704	16.7469	17.6017	19.5719	18.8747	19.6274	18.626	18.1547	23.4756	24.2844	18.3022	16.1695	22.6341	17.7141	14.2719	16.3399	16.731	16.6277	16.1926	15.4723	18.6423	16.3805	16.0434	19.5036	19.5315	15.9085	15.2315	16.5281	24.0584	18.2926	16.6276
(La/Yb)N	47.1688	26.5307	37.2488	34.2863	31.9818	42.2857	43.986	44.2725	36.7387	38.7483	61.2002	65.367	41.2692	31.1795	53.3696	42.0233	22.4808	29.6444	31.1825	32.3236	28.1988	29.3714	37.1465	39.8574	30.7742	52.6368	32.5196	28.2433	23.9386	35.3668	72.5134	49.4342	37.9662
δEu	0.891827	0.894808	0.948387	0.973098	0.997303	1.00802	0.956768	0.977189	1.00027	0.948096	0.964279	0.949104	0.952535	1.03825	1.00643	1.04918	0.797277	0.939362	1.00887	1.02092	0.96621	0.956245	0.957904	1.1391	1.02689	0.831923	0.940694	0.939186	0.80844	0.763058	0.726348	0.642116	0.93624
Sr/Y	63.4814	47.5136	53.003	58.2231	58.8992	74.7071	71.9973	72.7297	84.1791	83.5463	102.029	93.8402	59.8453	75.7405	86.238	66.6405	42.6242	67.5245	94.0614	83.1046	72.908	58.6675	79.2389	85.0754	57.2866	51.3771	111.156	68.3624	36.7854	48.7316	38.2031	68.3543	65.9691
La/Yb	65.7589	36.9869	51.9292	47.7992	44.5865	58.9513	61.3217	61.721	51.2181	54.0197	85.3203	91.1293	57.5341	43.4679	74.4035	58.5855	31.3409	41.3277	43.4721	45.0629	39.3124	40.9472	51.7866	55.5659	42.9028	73.3819	45.3361	39.3745	33.3733	49.3055	101.092	68.9171	52.9293
Nb/Ta	20.0222	14.2887	16.4739	16.8333	17.2072	16.932	16.0094	17.3249	15.8055	15.8111	15.8967	15.9775	16.1246	19.4195	15.8398	20.4158	18.9173	18.5774	19.5698	19.0917	17.9644	19.7965	20.3902	20.1228	17.354	20.1227	18.9645	19.6741	17.307	19.9963	21.0567	34.1163	17.5373
AR(Alkalinity Ratio)=(w(Al2O3)+w(CaO)+w(total alkalis) / (w(Al2O3)+w(CaO))-(w(total alkalis)), when w(SiO2)>50% and 2.5 > w(K2O)/w(Na2O) >1, w(total alkalis) = 2Na2O, otherwise, w(total alkalis) = w(Na2O)+w(K2O))
A/NK = Al2O3/(Na2O+K2O) molar, A/CNK = Al2O3/(CaO+Na2O+K2O) molar
Mg# = 100×molar Mg/(Mg+Fe).
The data of the mark * are from Dong et al. (2018).

## Sheet: Standard analyzed 
Major and trace elements data for the standard.
Major elements (wt. %)
Standard	GBW07103 (analyzed value)	GBW07103 (standard value)	GBW07111 (analyzed value)	GBW07111(standard value)
SiO2	72.7	72.83	59.68	59.68
TiO2	0.29	0.29	0.76	0.77
Al2O3	13.39	13.4	16.58	16.56
TFe2O3	2.14	2.14	6.12	6.06
MgO	0.42	0.42	2.76	2.81
MnO	0.06	0.06	0.09	0.09
CaO	1.52	1.55	4.66	4.72
Na2O	3.18	3.13	4.07	4.05
K2O	4.97	5.01	3.49	3.5
P2O5	0.09	0.09	0.33	0.34
LOI	0.69	0.69	1.04	1.04
Total	99.43	99.61	99.59	99.63
Trace elements (ppm)
Standard	AGV-2 (analyzed value)	AGV-2 (standard value)	RGM-2 (analyzed value)	RGM-2 (standard value)	Detection limits
Li	10.3524	11	58.2404	57	0.0748543
Be	2.15027	2.3	2.37209	2.37	0.0177038
Sc	13.5153	13	5.5598	4.4	0
V	120.252	120	12.3606	13	0.553788
Cr	15.6559	16	4.58141	5.9	0.855713
Co	15.9687	16	2.0937	2	0.0166782
Ni	20.7387	20	3.71837	5.2	0.330998
Cu	50.2589	53	10.0954	9.6	0.0769821
Zn	84.636	86	30.4213	32	0.316769
Ga	21.1261	20	16.2005	16.5482	0.0099379
Rb	67.1638	66.3	149.093	150	0.029466
Sr	661.297	661	110.66	107.5	0.0241888
Y	19.839	20	23.7186	23.1554	0.00501455
Zr	229.751	230	225.179	220	0.0250215
Nb	14.2085	14.5	9.24816	9.29555	0.0030744
Sn	1.87244	2.3	3.33773	3.34	0.0142764
Cs	1.09354	1.16	9.62746	9.6	0.00461966
Ba	1119.81	1130	837.362	810	0.33883
La	38.1693	37.9	23.2263	24	0.00486475
Ce	69.1853	68.6	46.0329	47	0.0060217
Pr	8.03939	7.84	5.24906	5.36	0.00330218
Nd	30.2764	30.5	19.5187	19	0.00707634
Sm	5.52971	5.49	4.12943	4.3	0.00280832
Eu	1.62404	1.54	0.648293	0.66	0.00182448
Gd	4.76568	4.52	3.71641	3.7	0.00305244
Tb	0.675066	0.64	0.631476	0.66	0.00161232
Dy	3.60295	3.47	3.72777	4.1	0.0101286
Ho	0.679422	0.65	0.772432	0.82	0.00309288
Er	1.93179	1.81	2.25219	2.35	0.00131627
Tm	0.27053	0.26	0.388489	0.37	0.00315621
Yb	1.64876	1.62	2.55999	2.6	0.00803914
Lu	0.264895	0.247	0.380126	0.4	0.00215605
Hf	5.21644	5	5.98607	6.2	0.00368501
Ta	0.827469	0.87	0.952482	0.95	0.00533106
Tl	0.309454	0.27	0.889857	0.93	0.0547853
Pb	13.6764	13.2	19.811	19.2713	0.0134987
Th	6.25409	6.1	14.7183	15.1	0.00445614
U	1.91007	1.86	5.75443	5.8	0.00477067
